# Supplementary material for: Theoretical Studies of Leu-Pro-Arg-Asp-Ala Pentapeptide (LPRDA) Binding to Sortase A of Staphylococcus aureus
Source: MDPI journal article supplement (doi:10.3390/molecules27238182), 2022-11-24

## Table of Contents

|                                                     |   |
|-----------------------------------------------------|---|
| RMSD for MD.....                                    | 1 |
| LPRDA-SrtA MD with 3 replicas for 10 ns.....        | 1 |
| Receptor.....                                       | 1 |
| Ligand.....                                         | 3 |
| SrtA (apo form) MD for 10 ns.....                   | 4 |
| LPRDA-SrtA complex MD for 90 ns (continuation)..... | 4 |
| Receptor.....                                       | 4 |
| Ligand.....                                         | 5 |
| RMSF analysis.....                                  | 7 |
| LPRDA-SrtA complex MD for 90 ns (continuation)..... | 7 |
| Receptor.....                                       | 7 |

## RMSD for MD

### LPRDA-SrtA MD with 3 replicas for 10 ns

#### Receptor

Table S1. RMSD values of the SrtA protein (C-alpha atoms) in LPRDA-SrtA complex.

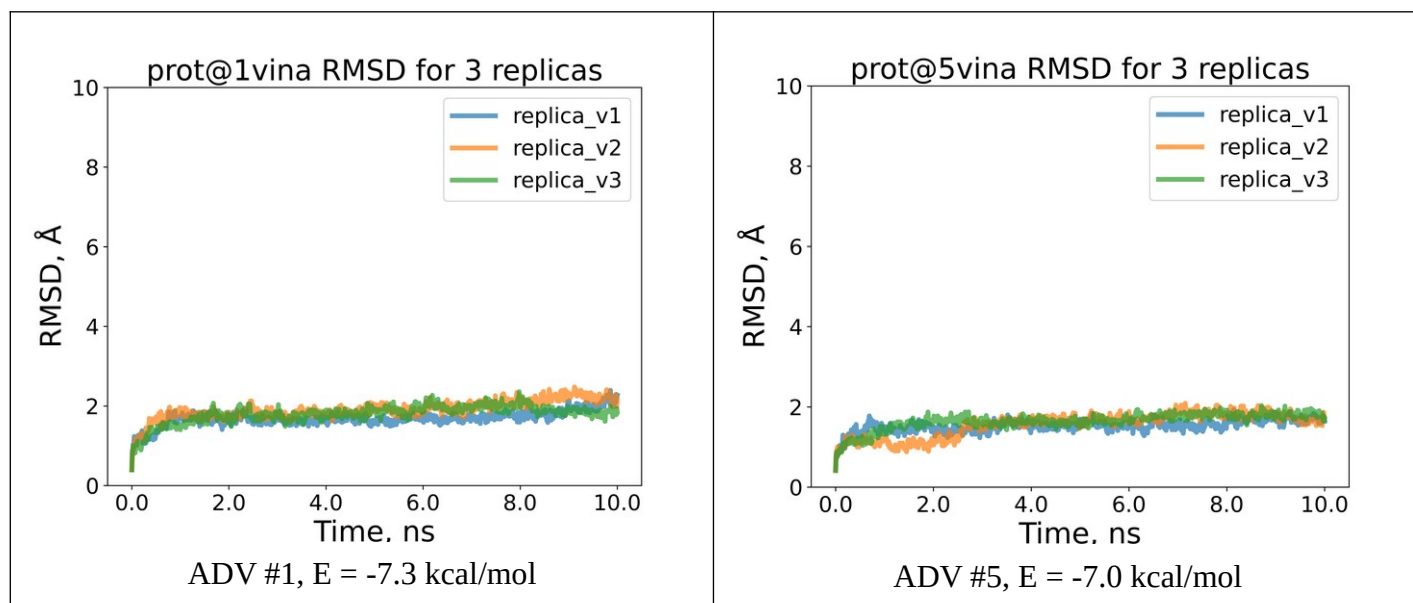

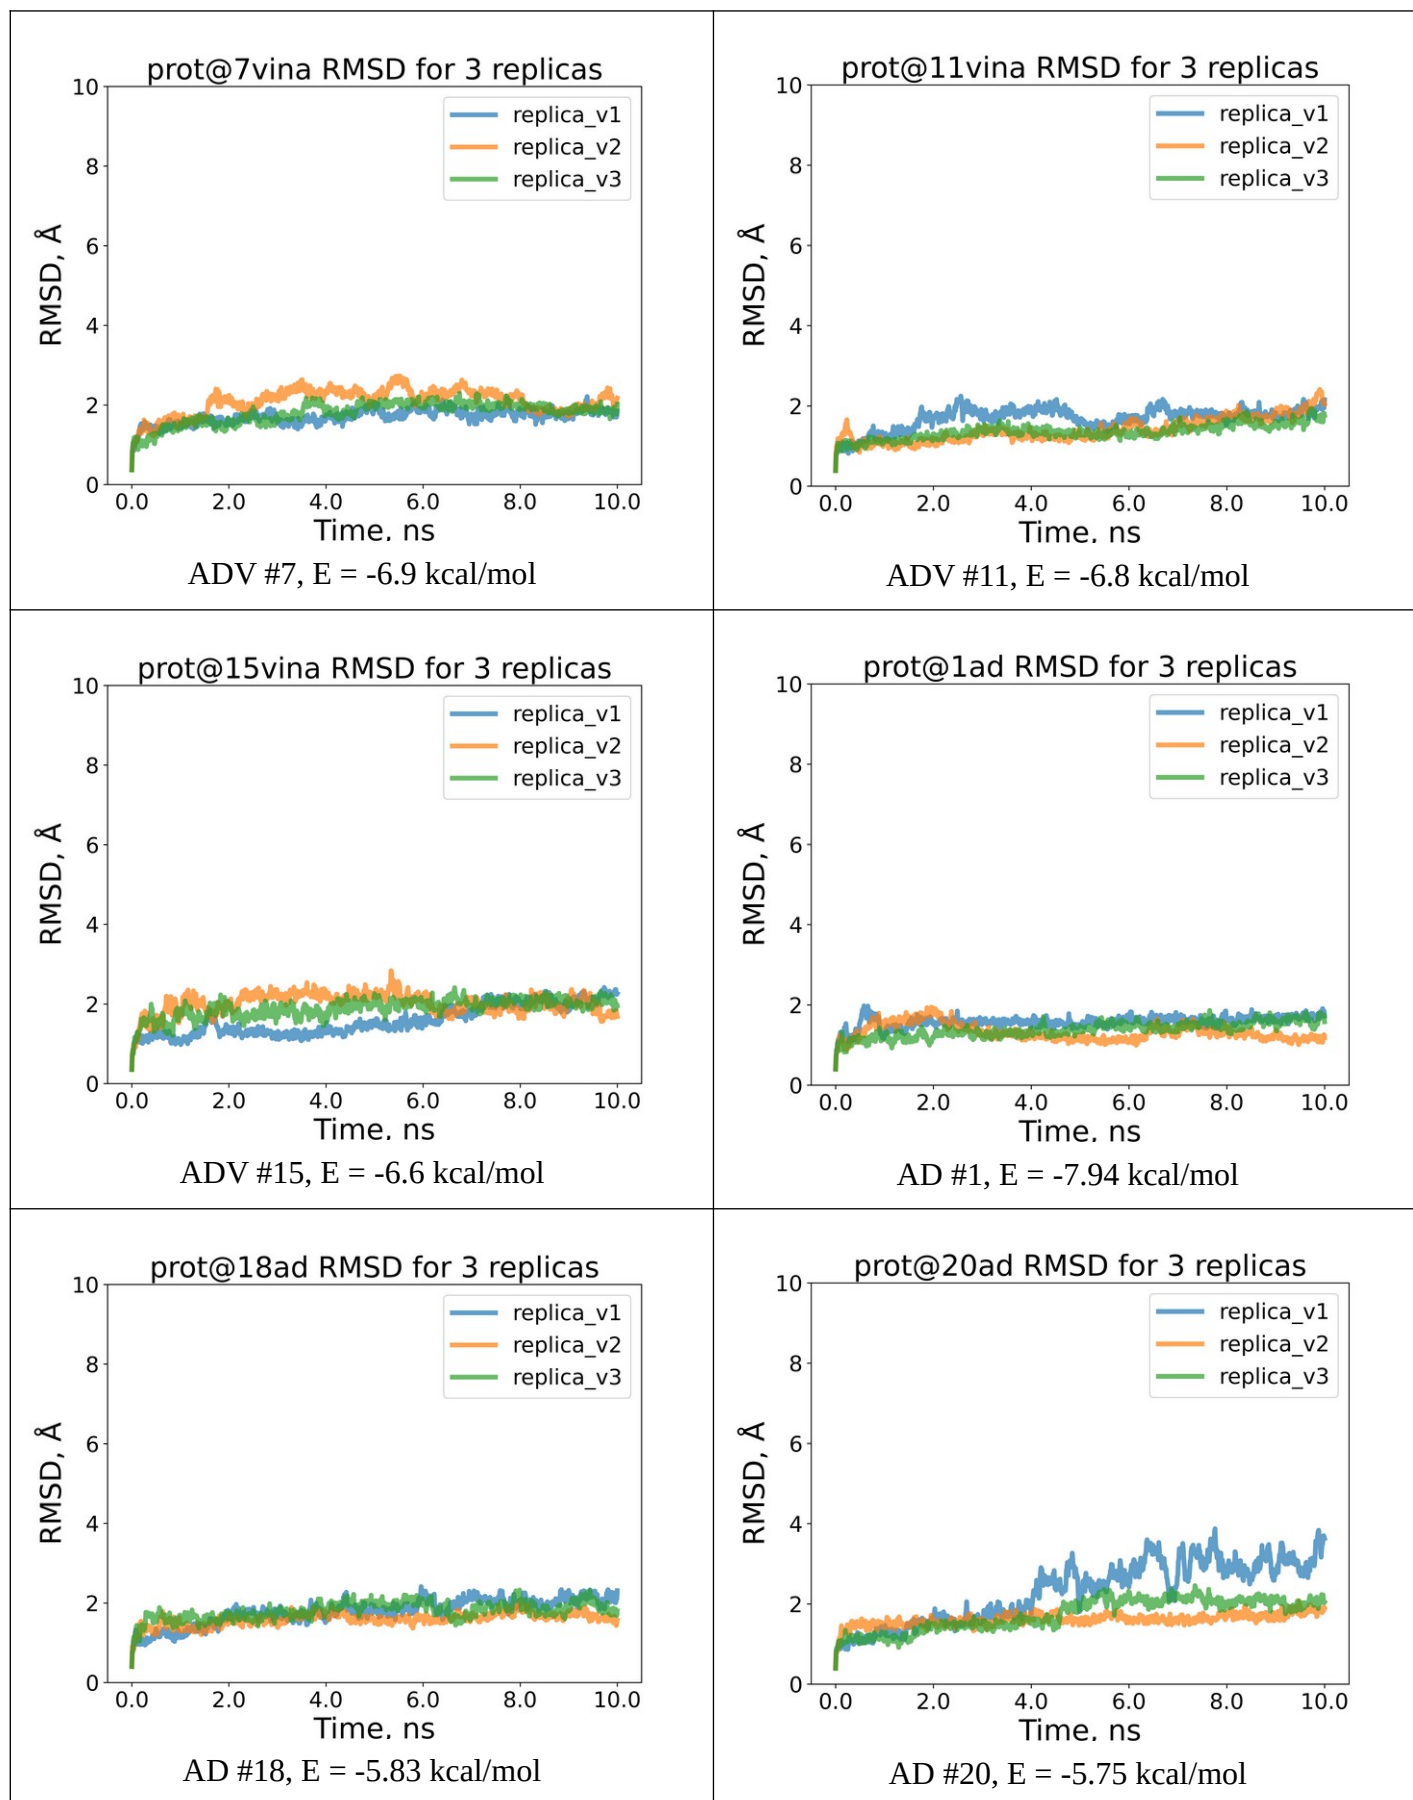

## Ligand

Table S2. RMSD values of LPRDA in LPRDA-SrtA complex.

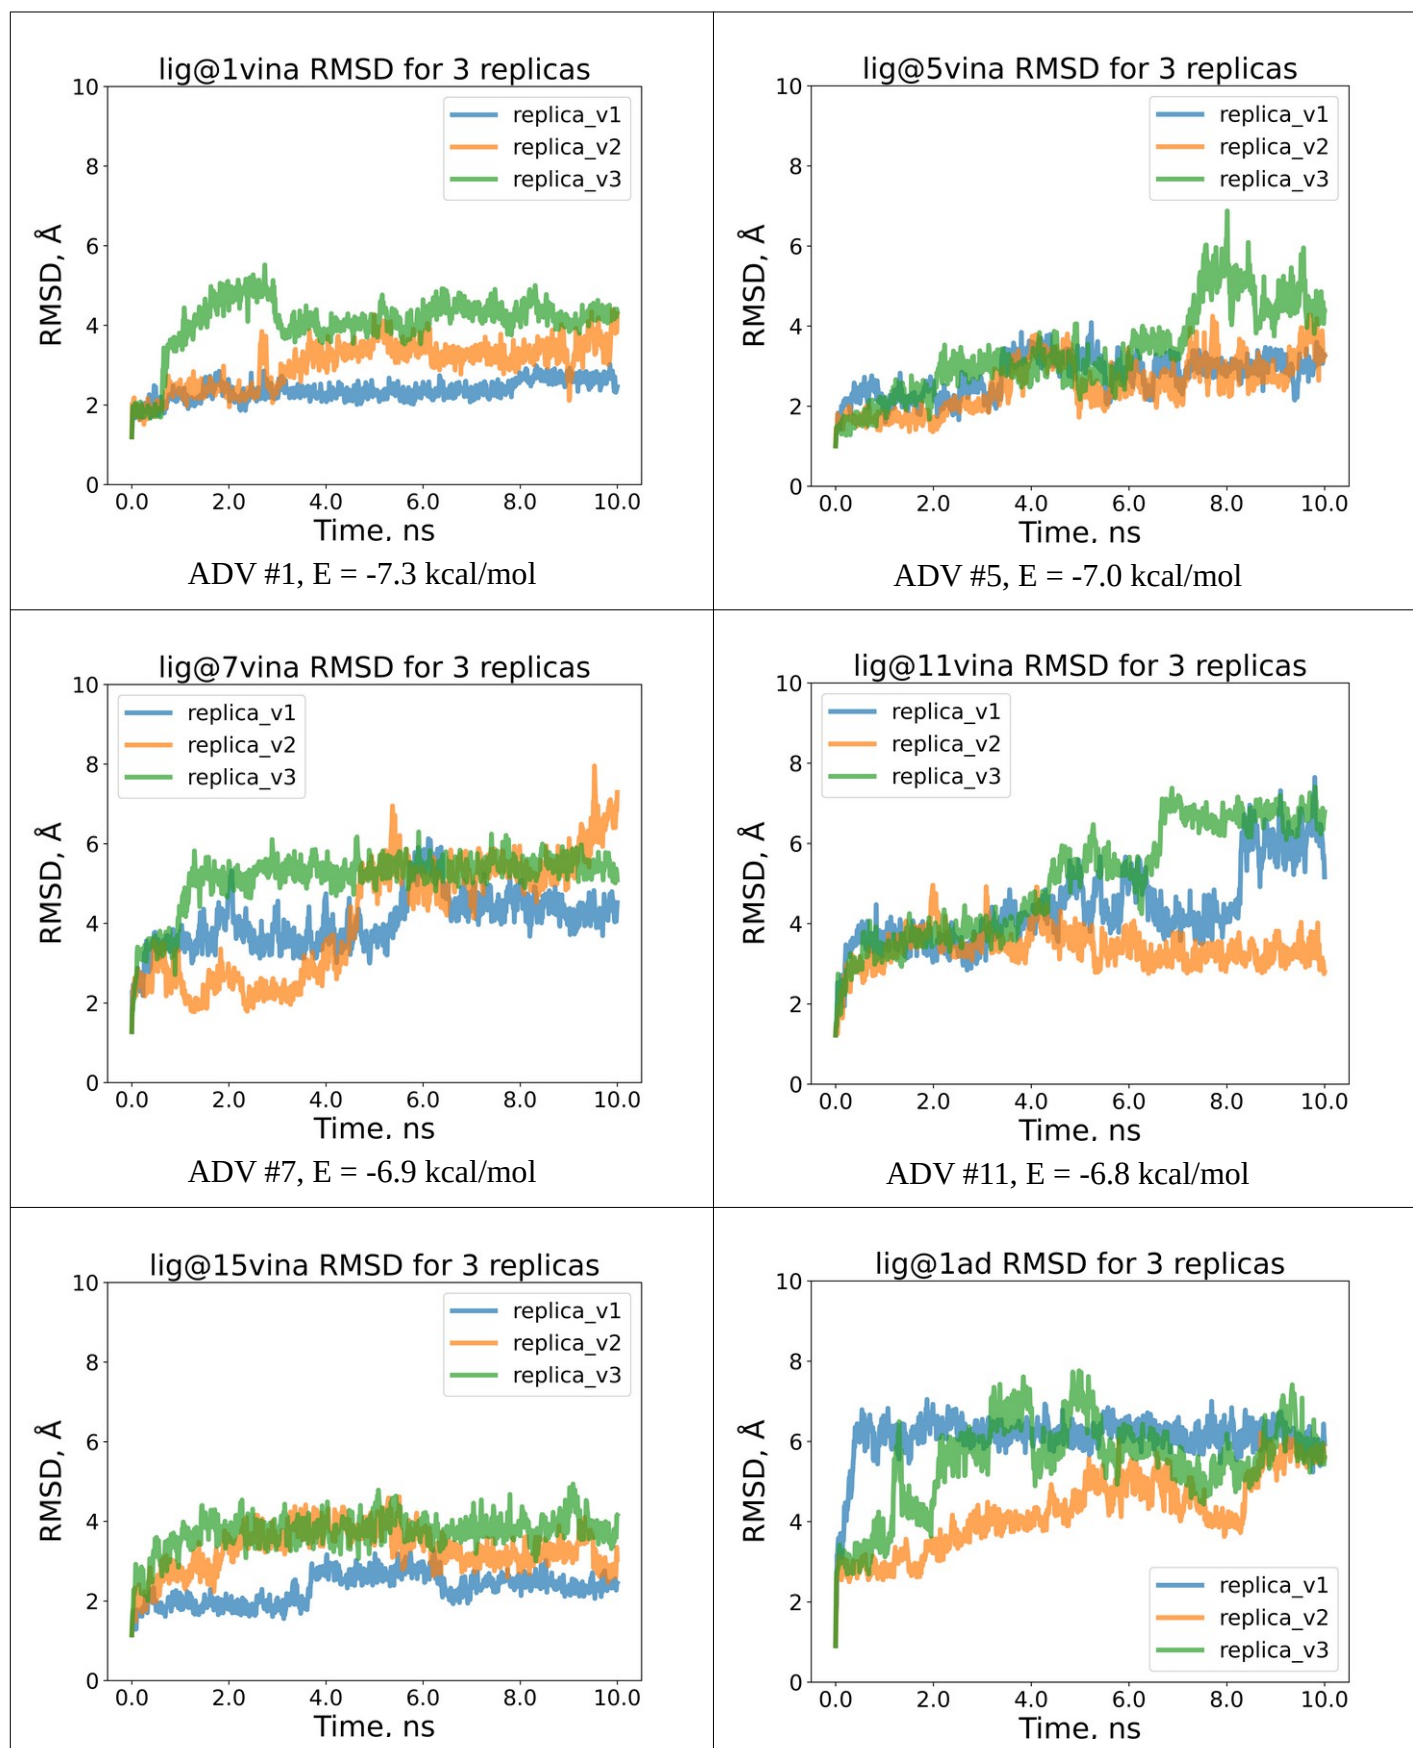

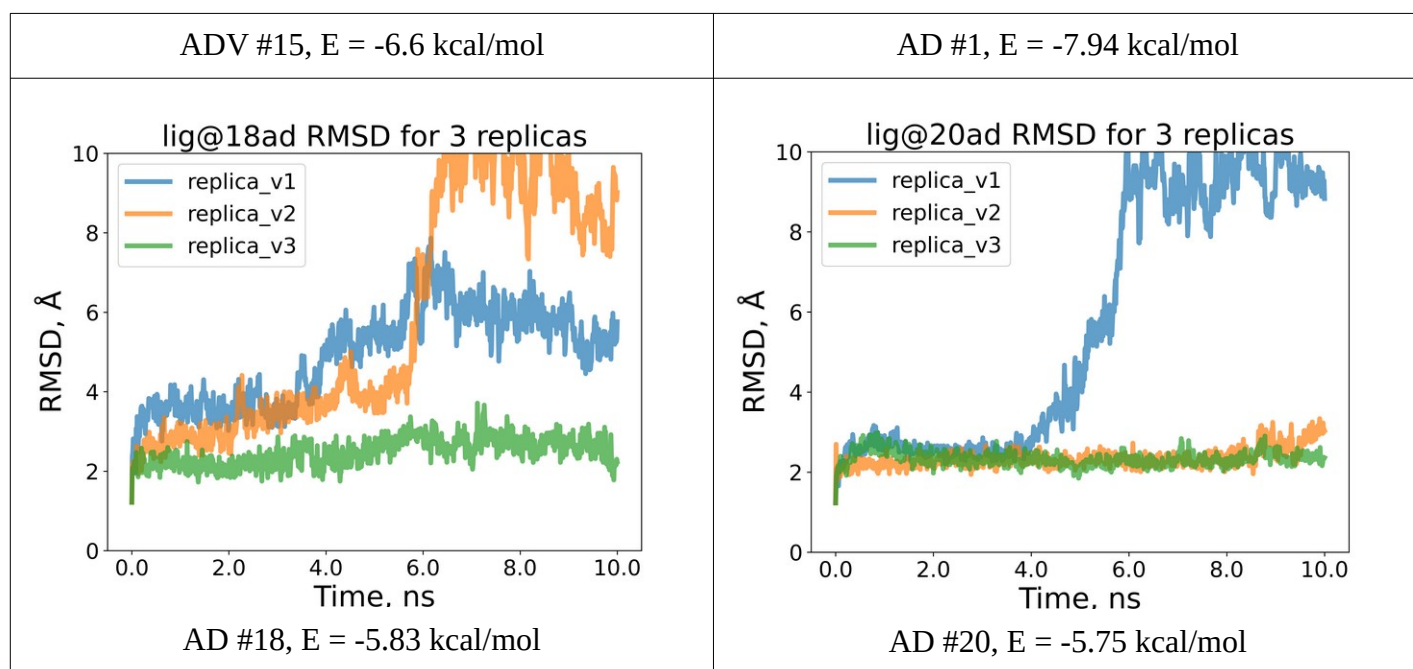

### SrtA (apo form) MD for 10 ns

Figure S1. RMSD of the apo form of SrtA during the 10 ns MD simulation.

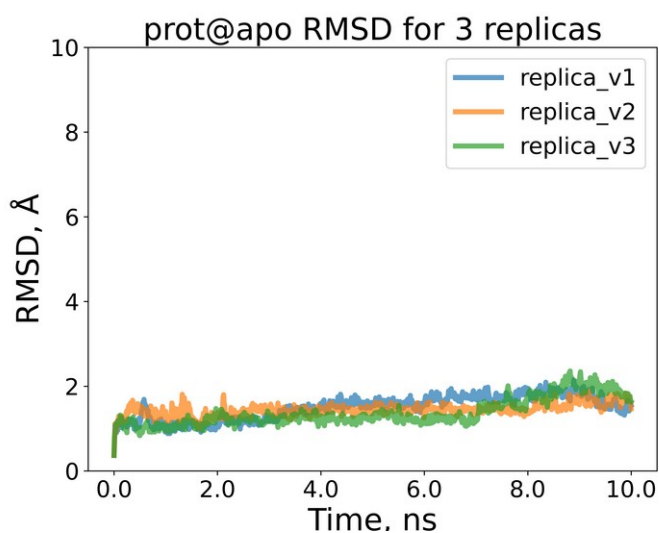

### LPRDA-SrtA complex MD for 90 ns (continuation)

#### Receptor

Table S3. SrtA (C-alpha atoms) RMSD for the continued MD (for another 90 ns) for the selected LPRDA-SrtA complexes. I. ADV #1 (repl.1), II. ADV #7 (repl. 1), III. ADV #7 (repl.3), IV. ADV #15 (repl.1), V. AD #18 (repl.3), VI. AD #20 (repl.3). The starting geometry for each complex was taken from the final geometries of the respective 10 ns MD trajectories.

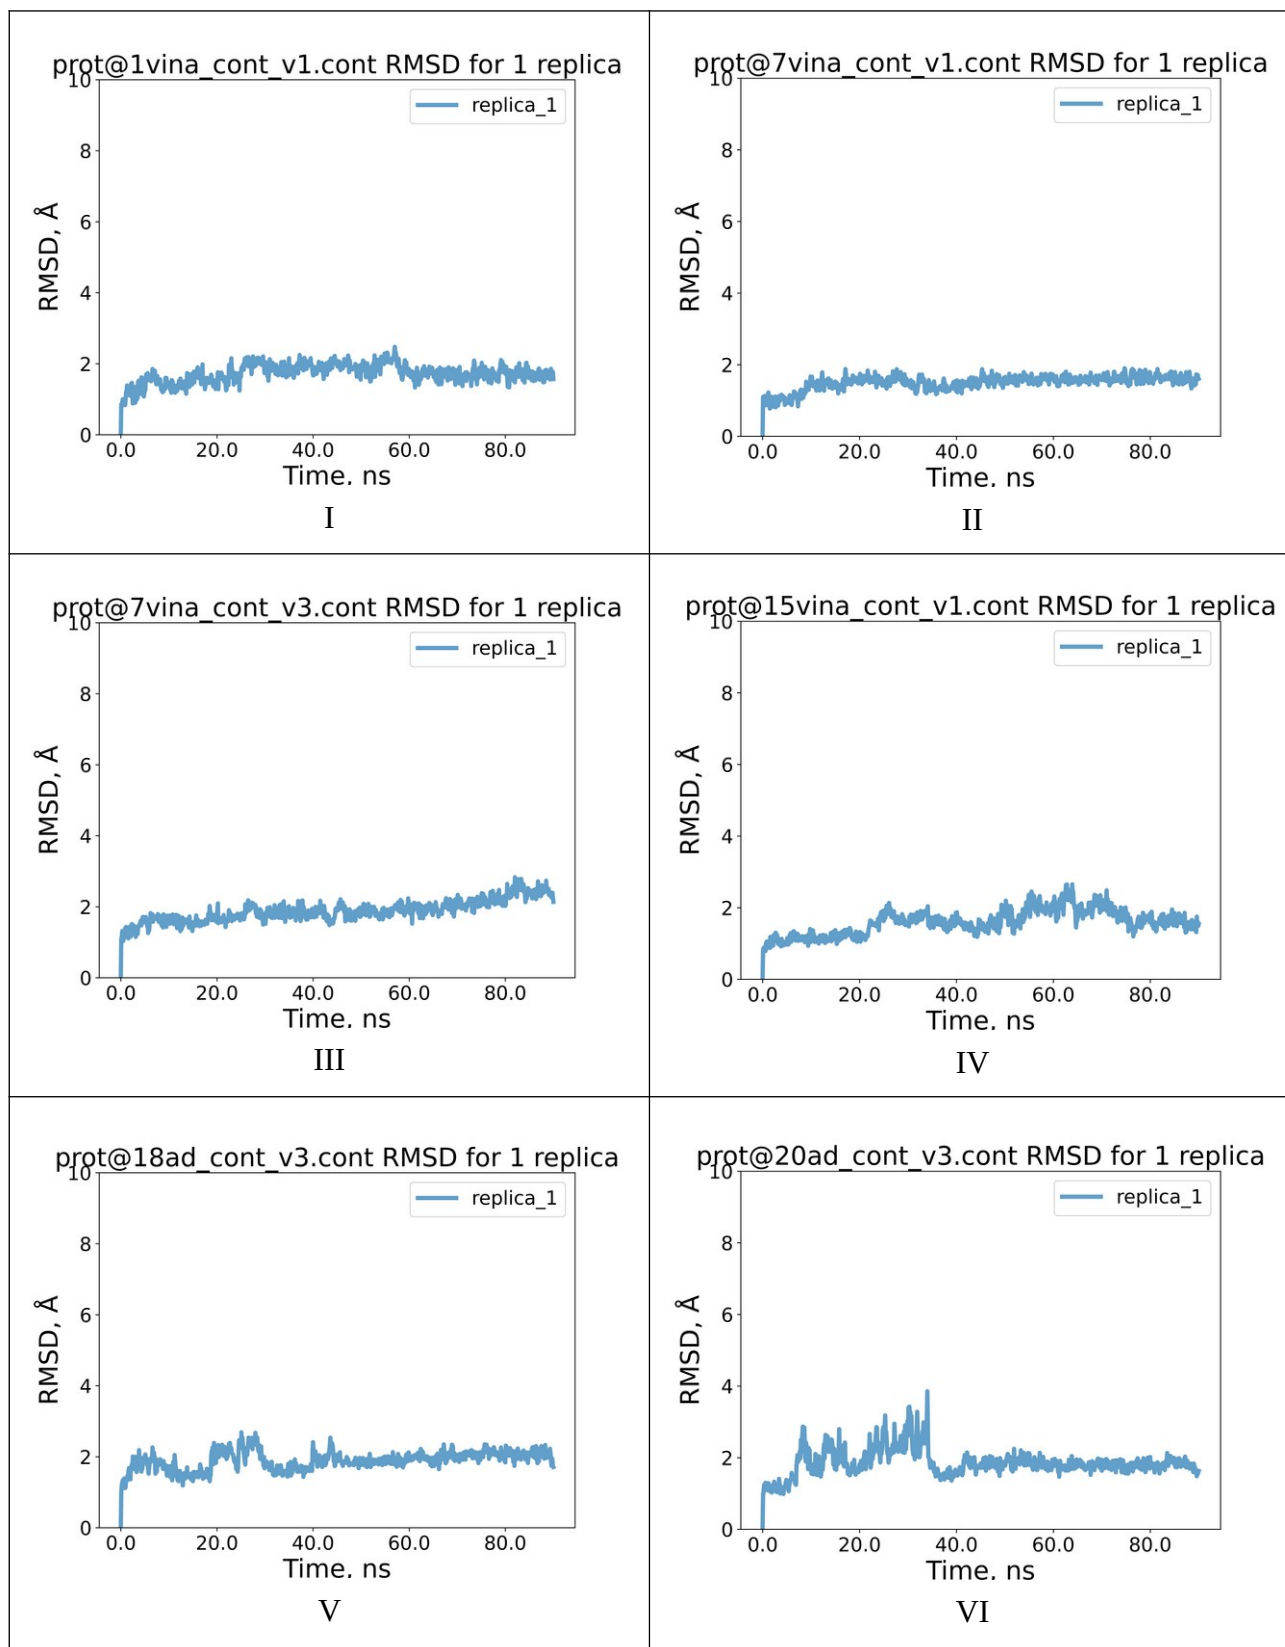

#### Ligand

Table S4. LPRDA RMSD for the continued MD (for another 90 ns) for the selected LPRDA-SrtA complexes. I. ADV #1 (repl.1), II. ADV #7 (repl. 1), III. ADV #7 (repl.3), IV. ADV #15 (repl.1), V.



AD #18 (repl.3), VI. AD #20 (repl.3). The starting geometry for each complex was taken from the final geometries of the respective 10 ns MD trajectories.

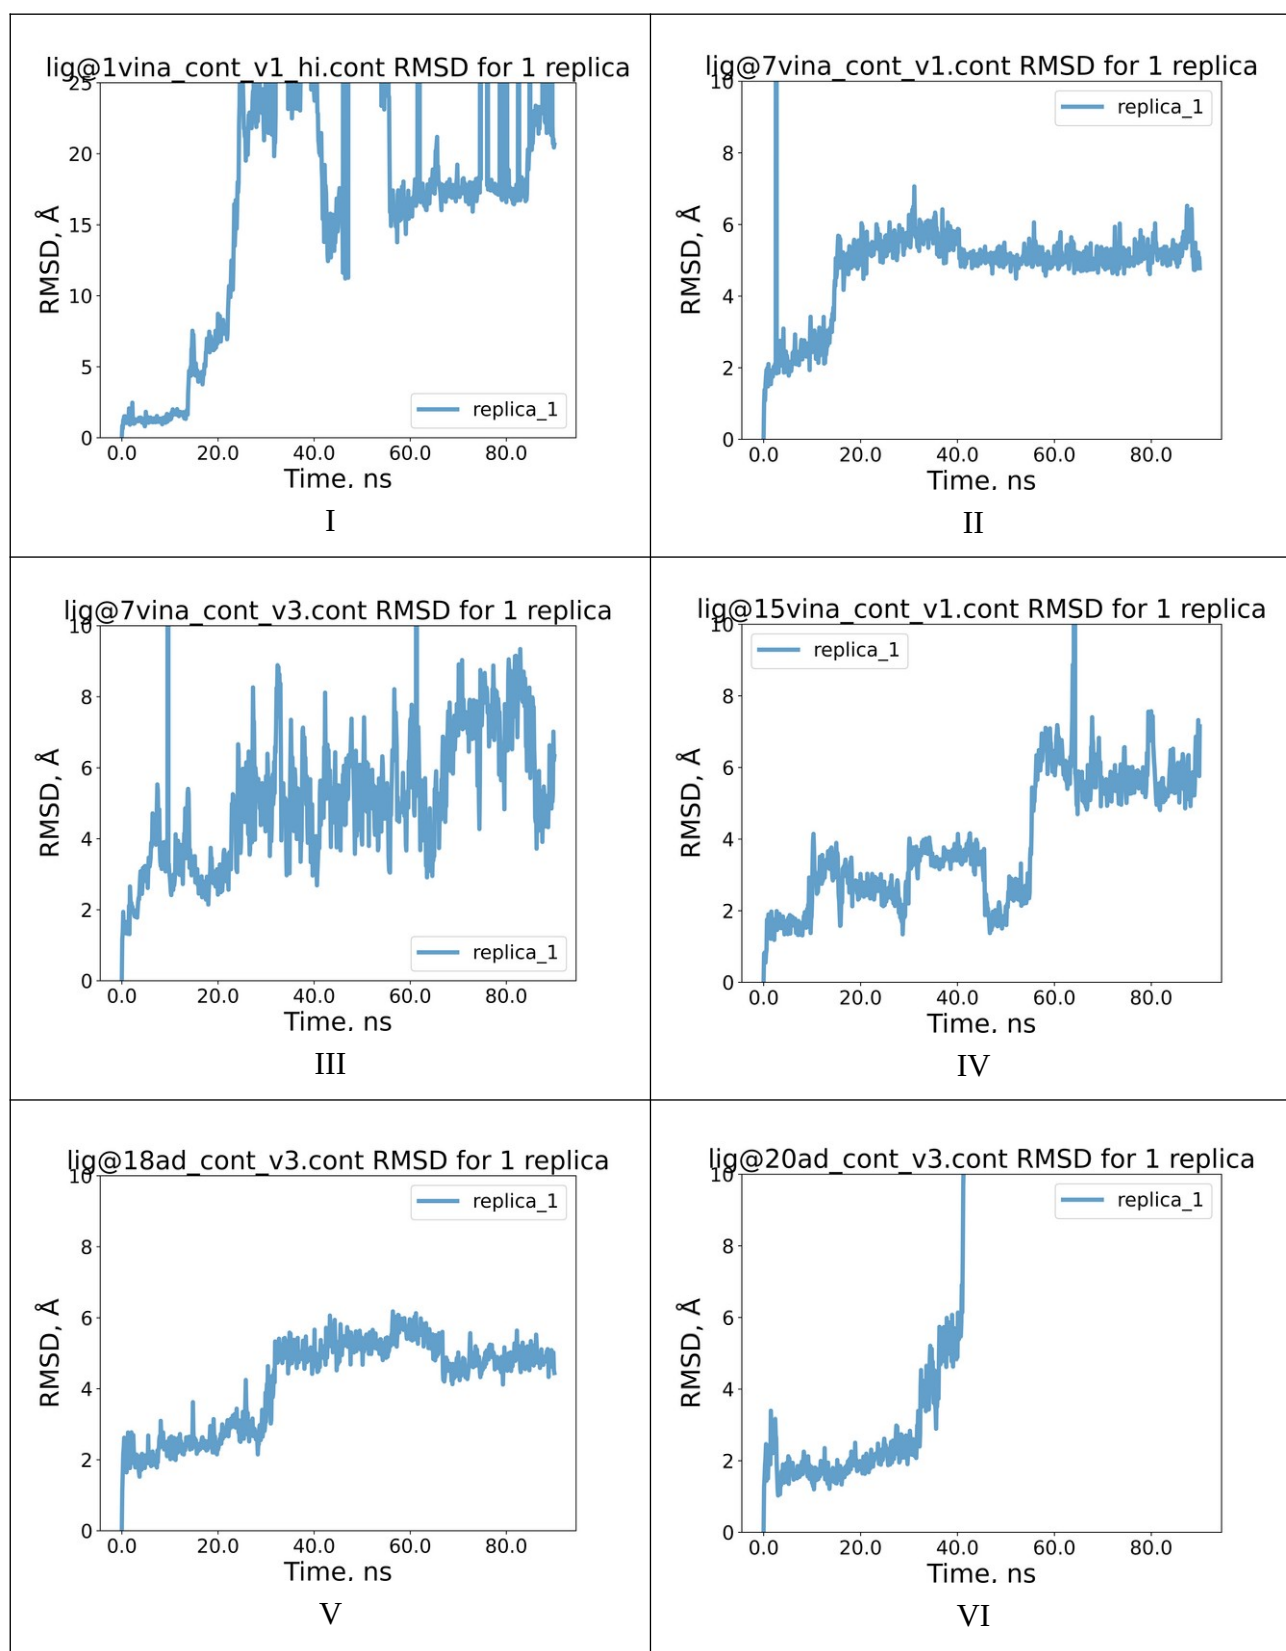

## RMSF analysis

### LPRDA-SrtA complex MD for 90 ns (continuation)

#### Receptor

Table S5. RMSF values obtained for the SrtA receptor from 90 ns MD simulation of 6 different LPRDA-SrtA complexes. RMSF values are obtained for C-alpha atoms.

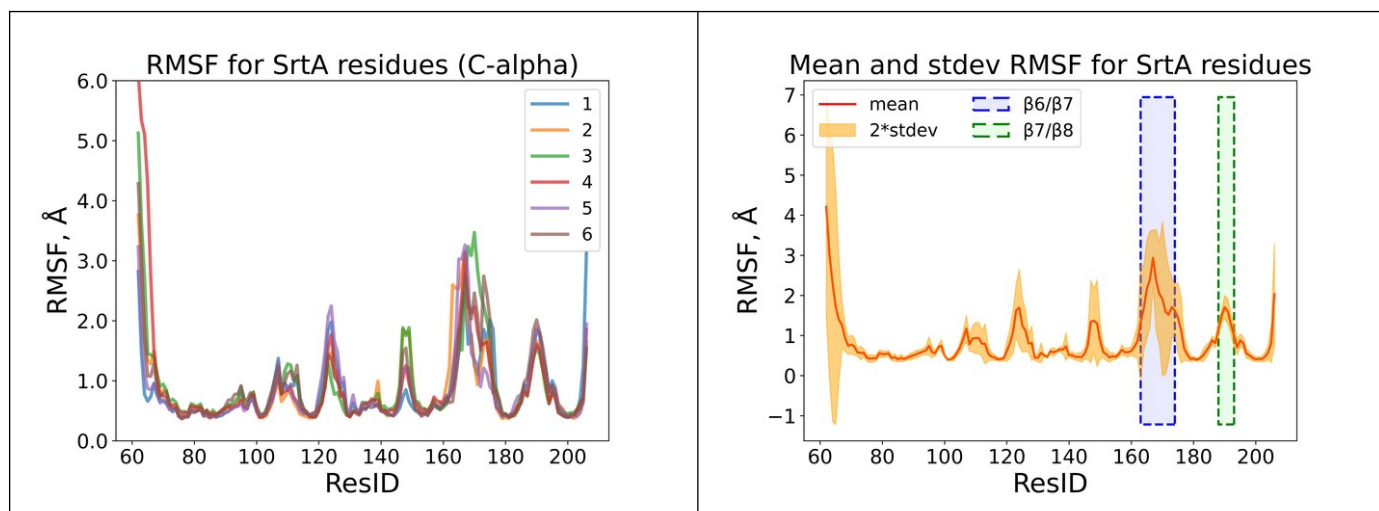

Supplement: s1 [file s1]
